# Supplementary material
Source: PubMed Central journal article supplement (PMC10111398)
Supplement: aim-olf-M223305-M22-3305_Supplement.pdf [file aim-olf-M223305-M22-3305_Supplement.pdf]

## Supplemental Material\*

Reis G, dos Santos Moreira Silva EA, Medeiros Silva DC, et al. Oral fluvoxamine with inhaled budesonide for treatment of early-onset COVID-19. A randomized platform trial. *Ann Intern Med.* 2023. [Epub ahead of print]. doi:10.7326/M22-3305

### Contents

|                                                                                                                                      |    |
|--------------------------------------------------------------------------------------------------------------------------------------|----|
| Trial Infrastructure and the Extended TOGETHER Investigators .....                                                                   | 2  |
| Description of Statistical Methods .....                                                                                             | 9  |
| Instrument for assessing the Credibility of Effect Modification Analyses (ICEMAN) in Randomized Controlled Trials (Version 1.0)..... | 10 |
| GRADE Analysis.....                                                                                                                  | 13 |
| Bayesian Analysis Code .....                                                                                                         | 14 |

\* This supplemental material was provided by the authors to give readers further details on their article. The material was not copyedited.

## **Trial Infrastructure and the Extended TOGETHER Investigators**

The COVID-19 TOGETHER Trial initiative was designed to evaluate repurposed treatments for COVID-19 disease through an adaptive trial design in two arms being conducted in Brazil and Canada. The trial is supported by a network of primary care research centers located in the state of Minas Gerais, Brazil and several sites in Toronto, Canada, devoted to a comprehensive evaluation and treatment of patients with COVID-19. The trial was fully integrated with local public health authorities (Brazilian Unified Health System – SUS) as part of coping strategy for COVID-19 pandemic. Namely, the main institutions involved were: Cardresearch – Cardiologia Assistencial e de Pesquisa and Toronto Centre for Liver Disease, University Health Network, Michael Garron Hospital, Sunnybrook Health Science Centre, Trillium Health Partners, Women’s College Hospital. This initiative is funded by FastGrants, The Rainwater Foundation, Eiger Biopharmaceuticals and the FTX Foundation.

The TOGETHER Trial consortium is a partnership between academics and clinicians at McMaster University in Ontario, Canada, and Pontificia Universidade Catolica de Minas Gerais, Claros State University, University of Ouro Preto in Minas Gerais, Brazil and University Health Network in Ontario, Canada. Other partners include Cytel, Platform Life Sciences, MMS Holdings, WHO Therapeutic Guidelines Committee, and the Society for Clinical Trials.

### **Brazilian Executive Committee**

Gilmar Reis<sup>1,2</sup>, Eduardo ASM Silva<sup>1,2</sup>, Daniela CM Silva<sup>1,2</sup>, Castilho VQ Santos<sup>2</sup>, Ana MR Nogueira<sup>3</sup>, Ana PFG Almeida<sup>3</sup>, Adhemar DF Neto<sup>4</sup>, Leonardo CM Savassi<sup>5</sup>, Luciene B Ribeiro<sup>1</sup>, Maria IC Simplicio<sup>1</sup>, Thiago S Ferreira<sup>1</sup> Vitoria HS Campos<sup>1,2</sup>.

### **Steering and Executive Committee**

Gilmar Reis<sup>1,2</sup>, Lehana Thabane<sup>6</sup>, Jamie Forrest<sup>7,8</sup>, Edward J Mills<sup>6,7</sup>

<sup>1</sup>Cardresearch – Cardiologia Assistencial e de Pesquisa, Belo Horizonte, Brazil; <sup>2</sup>Pontificia Universidade Catolica de Minas Gerais, Belo Horizonte; <sup>3</sup>Department of Public Health at UniFipMoc and Family Medicine Fellowship, City of Montes Claros, Brazil; <sup>4</sup>Federal University of Juiz de Fora, Governador Valadares, Brazil; <sup>5</sup>Federal University of Ouro Preto, Ouro Preto, Brazil; <sup>6</sup>McMaster University, Hamilton, Canada, <sup>7</sup>Cytel Health, Vancouver, Canada, <sup>8</sup>University of British Columbia, Vancouver, Canada.

### **Data Safety and Monitoring Committee**

William Cameron, University of Ottawa (Canada), James Orbinski, York University (Canada), Sonal Singh, University of Massachusetts (USA), Kristian Thorlund, McMaster University (Canada), Jonas Haggstrom of Cytel Inc. (Sweden).

### **Clinical Events Classification Committee**

Gilmar Reis<sup>1,2</sup> (chair), Luciene B Ribeiro<sup>1</sup> (adjudicator), Thiago S Ferreira<sup>1</sup> (adjudicator), Ana MR Nogueira (adjudicator)<sup>1</sup>, Laura C Oliveira<sup>1</sup> (operations manager), Heloísa A Costa<sup>1</sup> (operations manager), Daniela CM Silva, Eduardo ASM Silva,

<sup>1</sup>Cardresearch – Cardiologia Assistencial e de Pesquisa, Belo Horizonte, Brazil; <sup>2</sup>Pontificia Universidade Catolica de Minas Gerais, Belo Horizonte, Brazil.

### **Trial Operations**

Maria IS Simplicio<sup>1</sup> (site manager), Thais C Siqueira<sup>1</sup> (site monitoring), Nayara S Drumont<sup>1</sup> (site monitoring), Leticia C. Siqueira<sup>1</sup> (site monitoring), Stephanny K Bessa<sup>1</sup> (site monitoring), João VB Vieira<sup>1</sup> (telemonitoring manager), Kenia SG Gonçalves<sup>1</sup> (site monitoring), Laura C Oliveira<sup>1</sup> (operations manager), Heloisa A Costa<sup>1</sup> (operations manager), Vania R Campos<sup>1</sup> (administrative manager), Aline LJ Martins<sup>1</sup> (logistic manager), Rosemary M Oliveira<sup>1</sup> (international affairs manager), Carla SO França<sup>1</sup> (data management), Aline C Milagres<sup>1</sup> (data management), Luciene B Ribeiro<sup>1</sup> (regulatory affairs manager), Tainara S Vieira<sup>1</sup> (regulatory affairs), Lineria HM Suterio<sup>1</sup> (pharmaceutical operations manager), Josue Rodrigues Silva<sup>2</sup> (director of clinical operations)

- 1) Cardresearch – Cardiologia Assistencial e de Pesquisa, Belo Horizonte, Brazil.
- 2) Platform Life Sciences, Vancouver, Canada.

### **Virology laboratory**

Adelino de melo Freire Junior<sup>1</sup> (clinical director), Ana Carolina Fialho Dias Rocha (director, immunology division)<sup>1</sup>, Ana Paula de Faria Gonçalves<sup>1</sup>, Andressa França<sup>1</sup>, Carlos Eduardo Dias Igídio<sup>1</sup>, Igor César de Oliveira Sousa<sup>1</sup>, Iracema Luisa Quintino de Carvalho<sup>1</sup>, Larissa Maria Manini Benavides<sup>1</sup>, Patrícia de Oliveira Pereira<sup>1</sup>, Phelipy Marques de Sousa<sup>1</sup>, Sabrina de Almeida Lima<sup>1</sup>, Silvia Helena Sousa Pietra Pedroso<sup>1</sup>, Snaydia Viegas Resende<sup>1</sup>, Wellington da Silva Rocha<sup>1</sup>, Thamiris Caldeira Alves<sup>1</sup>

- 1) Target – Medicina de Precisão, Belo Horizonte, Brazil

### ***Participating Enrolling Centres***

Included below are representatives from the enrolling centres at participating cities that enrolled at least 1 patient. Centres are listed in order of enrolment contribution. All study sites were located in the State of Minas Gerais, Brazil or Ontario, Canada.

### **Cardresearch – Cardiologia Assistencial e de Pesquisa, Belo Horizonte**

Aline Lúcia de Jesus Martins, Amanda Gouvêa Mesquita, Amanda Larissa Alves Mendes, Anna Beatriz Oliveira Mendes, Anna Clara de Jesus Oliveira, Barbara Nogueira Roberti, Carolina Couto de Azevedo Cysne, Clara Bensemam Gontijo Pereira, Cecília Campos Siqueira, Ednilson Barbosa Dias, Emanuelle Cristina Soares Gonçalves, Fernanda Leal Guimarães, Flávio Eduardo Giorgeto, Gabriel Torga Saade Rodrigues, Gislânia Neres de Sousa, Júlia Campos de Rezende, Júlia Diniz Assis Moreira, Heloisa Alves Costa, Isabela Canabrava Soares, João Victor Barbosa Silveira, Joselaine Gomes de Souza, Juliana Marques Santos Ferreira, Kênia Sthéfane Guimarães Gonçalves, Laura Campos Oliveira, Layane Maria de

Almeida, Letícia Campos Siqueira, Letícia de Fátimas Costa, Lorena Gabrielle Miranda Maciel, Lorena Giovanna Silva Peixoto, Lorena Mesquita Alves, Luana Rosa Rodrigues, Luciene Barra Ribeiro, Luisa Andrade de Almeida, Marcela Luíza Amaral Resende Lara, Luíza Lanna França Reis, Marcela Luiza Amaral Resenda lara, Maria Izabel Campos Simplício, Maria Eduarda Gomes Horácio, Maria Eduarda Martins Soares, Maria Luiza Magalhães Parreiras, Mariana Campos Siqueira, Mariana Cristina Flores Mariano, Marina Guimarães Bragatto, Matheus Andrade Almeida e Silva, Mayra Estefane Silva dos Santos, Mirele Augusta Batista Ribeiro, Nayara Santos Drumond, Pedro Hosken Fernandes Guimarães, Pollyana Maria Silva Diniz, Roberta Dumont Paiva Lopes, Rosemary Muniz de Oliveira, Stephanny Kelvyn Bessa, Sheila Soares Anselmo, Tainara Silva Vieira, Tatiana Aparecida Gomes da Silva, Thiago Santiago Ferreira, Thais Campos Siqueira, Vânia Regina Carmo, Vitor Augusto Lima do Vale, Vitor Vilaça Oliveira, Wedsley Sander Lopes dos Santos

### **City of Santa Luzia**

Aline Daniele de Almeida Abreu, Bernardo Saraiva Resende de Camargos, Camila Araújo Heringer, Daniel Jacinto Mendonça Filho, Eriane Damasia Faria de Almeida Abreu, Felipe Augusto Pereira Barnabé, Felipe Alves Vieira, Gabriella Fagundes Carvalho, Higor Gomes Mussi, Hilton Cardoso Arruda Macedo, Igor Bernardes Caciquinho, João Pedro Ribeiro Santos, João Ricardo Garcia Costa, José Lauro Guimarães Cardoso, Júlia Berlim de Abreu, Lorena Rodrigues de Carvalho, Lorena Amaral de Oliveira, Luana Rocha Oliveira Matos, Marcela Ferreira Brito, Mariana Cavaliere Batista e Silva, Matheus Lucca Ângelo Costa Rodrigues, Mateus de Oliveira Ferreira, Murilo Passinati Perez, Natalia Batista Zanetti, Rafaela Ribeiro de Almeida, Sarah Jeniffer da Silva Jamar, Sofia Caporalli Barbosa, Sofia Vianna Von Bentzen Rios, Stella Silva Rosa, Thomaz Takashi Ferreira Morimoto, Verônica de Araújo Libânio costa, Vitória Helena de Souza Campos, Vitor Augusto Alves da Silva

### **City of Betim**

Amanda Cypestre Alves Batista, Ana Flávia Gomes Viana, Ângela Rodrigues Vieira Santos, Anna Luiza Ribeiro Flores, Arthur Guimarães Rodrigues Dutra, Bruna Luiza Maia, Clarisse Lourdes Nadú de Almeida, Daniel Domingues Barbosa, Daniela Carla Medeiros, Daniele Saionara da Silva, Diuly Ane Faria Rezende, Eduardo Augusto dos Santos Moreira Silva, Felipe Menezes Andrade, Fernanda Rúbia Batista, Gabriela Ferreira Reis, Giovane Carvalho Constantino Ferreira de Paula, Geovani de Araújo Júnior, Henrique Amaral Fonseca Pires, Jéssica Aguilar Silva, Isabela Lovatti Rovetta, João Pedro Ribeiro Santos, Júlia Silva Rangel, Júlia Lima Soares de Paula, Juliana Oliveira Costa, Lucas Júnio da Silva, Luiz Gustavo Fernandes Dias, Lívia Francino Oliveira, Lucas Rodrigues Pereira Barros, Lucas de Souza Gontijo Pessoa, Lucas Klier Silva, Maria Luisa Lara Lanza Stabile, Mariana da Rocha Assis Pinto, Nicholas Vanzin Cunha, Paloma Alister Vilela da Silva, Rafael Silva Rodrigues Soares, Thais Gomes de Oliveira, Victor Oliveira de Araújo, Vitor Augusto Alves da Silva, Wesley Costa Arcanjo.

### **City of Nova Lima**

Alice Pinheiro Vanetti, Ana Carolina Araújo Lage Santos, Ariade Gomes Freitas, Felipe Viana Santos, Fernanda Freitas Pinheiro, Fernanda Perez Rocha, Filipe Viana Santos, Giulia de Jesus Marcolino, Henrique Amaral Fonseca Pires, Humberto Drumond Filho, Isabela Gontijo Mendonça, Isadora Gomides Faria, José Victor Mendes Milhomem, Larissa Milagres Mol, Letícia de Fátima Costa, Luana Rocha Oliveira Matos, Marcelo Bernardes Rocha Júnior, Maria Constância Miranda, Nathália Euclides Gonçalves, Suzana Cristina Ricco, Thiago Araújo do Nascimento

### **City of Sete Lagoas**

Amanda Luiza do Espírito Santo Pinheiro, Ana Carolina Matos Ferreira, Ana Caroline Santos Silva, Ana Luiza Silva Taveira, Bruno Victor de Souza Lima, Castilho Vitor Quirino dos Santos, Débora Siqueira Diana, Emanuela Pontes Pereira Silveira, Francisca Lina Campos Gonçalves, Gabriel Corrêa Costa, Geraldo César Barroso de Souza, Guilherme Aurelio D'Oliveira Alves, Isadora Luiza Teixeira Neto, Jordanna Porto Inácio, José Paulo Ribeiro Silvério, Lara Silveira Marques, Larissa Martins do Nascimento, Larissa Oliveira Moreira, Lorena Luiza Soares de Oliveira, Lucas Eduardo Lessa Mussi, Lucas Medeiros Ruas, Luiza Nogueira Assis Barbosa, Luiz Otávio de Sousa, Marcelo Rodrigues da Costa Fernandes, Maria Eduarda Guimarães de Souza, Maria Thereza Figueiredo Bélem Calazans, Mariana Rodrigues Marinho de Bastos, Pedro Henrique Arcanjo Alvarenga, Quimberli Vassinave Cujuí, Rafaela Valadares Diniz, Rafael Cota Andrade Ferreira de Souza, Rita de Cássia Silva, Vinícius Alves Corrêa, Vinícius Carvalho de Oliveira, Vitória Aparecida Cunha, Viviane Costa Santos

### **UniFIPMoc - City of Montes Claros**

Ana Maria Ribeiro Nogueira, Ana Paula Figueiredo Guimarães de Almeida, Ana Paula Guimarães Alves de Carvalho, Antônio Henrique Batista Jorge, Artur Pimenta Ribeiro, Elisângela Santos Sena, Cleide Rocha Veloso, Gonçalves Eleutério Murta, Inara Maria Gomes Cardoso, João Warley Alves, Jorge Fernando Rocha Veloso, Joyce Souto Barbosa Pimenta de Figueiredo, Karolina Campos Sampaio Lopes, Larissa Vieira Souza, Loren Montanha Costa, Ludimila Pereira de Souza, Maria de Fátima César Lima, Maria Izabel Silveira Gonçalves, Marizete Gislaine Mendes, Mayra Darlliane Loiola Silva, Nayara Santos Drumond, Raissa Rocha e Fonseca, Samuel de Paiva Oliveira, Thiago Rodrigues Ferro

### **City of Ibirité**

Aline Cruz Milagres, Ana Carolina Aguiar Estevam, Ana Martins de Oliveira, André Henrique de Sousa

Oliveira, Carina Bitarões, Carla Stefany Oliveira França, Hayka K. Rodrigues Freire, Laís Aparecida dos Reis Gama, Laylla Michelle Pereira, Luciléia Alcântara Gomes e Silva, Patrícia Santana Assis, Regiane Aparecida de Andrade, Thaís de Paula Ferreira da Silva, Thiago de Alcântara César

### **City of Governador Valadares**

Adhemar Dias de Figueiredo Neto, Adriana Marcos Mendes Rabelo, Aline do Carmo Rosa, Ana Paula Vilas Boas Wherberth, André Gustavo Pinto de Souza, André Luiz Souza Gomes, Arthur Henrique Nunes Leite Oliveira, André Gustavo Pinto de Souza, Damiana Rogai Siqueira, Emanuel Peixoto Pinto, Felipe Coelho Soares de Oliveira, Felipe Fraga Damaceno, Guilherme Rhis, Iandra Silva Almeida, Igor Barros de Araújo Borges, Igor Brandão Rocha, Jéssica Genoveva Boline Passarelli Capaz Pinto da Silva, Jorge Carlos do Amaral Júnior, José Pio Marques II, Laura Lima Vargas, Lorena Cristina Ferreira Batista, Luiz Eduardo Coelho Fava, Luiza de Azevedo Freitas Giles, Marina Lacerda Marques, Maura Alina Morais Veríssimo, Neila Rodrigues Vargas de Paula, Pâmela de Sousa Dias Demuner, Ramail Santos Pouzas, Roberta Coelho de Marco, Rafaella Rosa de Oliveira Fernandes, Ronan Figueiredo Mourão, Sabrina Stefany da Silva Souza, Sara Silva Ferraz

### **City of Brumadinho**

Ana Beatriz Amorim, Carolina Francisca Martins, Eduardo Diniz Callegari, Geovanna Carla Cordeiro, Huisnei Ferreira Lourenço, João Victor Fagundes dos Santos, João Pedro Donato Veloso, Júlia Alves Santos, Júlia senra Nogueira, Jussara Carolina Assis Ribeiro Nascimento, Lavínia de Fátima Baldim Martins, Lucca Batista Rocha de Menezes, Maria Clara Damaso da Silva, Mariana das Graças de Aquino Santos, Rafael Augusto de Carvalho Leão, Solange Santos Moreira Sales, Vitor Franco Moreira

### **City of Igarapé**

Amanda Diniz Friedmann, Barbara Carvalho Chaves, Janaína Leyner de Andrade Oliveira, Júlia Silva Diniz, Luiz Felipe de Oliveira Braga, Luiza Gabriele Dutra Duarte, Marcela Julia Rufino Duque, Mariana Cristina Flores Emiliano, Rafaela Carolina Silveira, Virgínia Mara Santos Moreira

### **Federal University of Ouro Preto, City of Ouro Preto**

Aline Dias Bedetti, Amanda Faria Simoni Campos, Andressa de Almeida, Anna Carolina Motta Costa, Clara Tornelli de Almeida Cunha, Cristiana Silva Mascarenhas, Daniel Ananias da Silva, Diana Antoniazzi de Sá Ribeiro, Diana Luiza Marinho Brandão, Érico Henrique Araújo de Moraes, Felipe César Soares, Flávia Marcella Sena Gonçalves Borba, Karinna Guimarães Gomes, Leonardo Caçado Monteiro Savassi, Marco Wellington Junio Estevam, Matheus Ramos Lopes, Marina Eduarda Santos, Maryane de Oliveira

Silva, Nágella Samara Eleutério da Silva, Rafael Rocha Carneir, Rayane Elen Fernandes Silva, Ruan Carling Schott Wondollinger, Yuri Barbosa de Menezes

**Santa Casa de Misericórdia, City of Sabará**

Bárbara Ellen Souza Rezende, Catarina Giovanna Simões Costa, Gabriel Antônio Simões Costa, Gabriel Marcos theodoro Cardoso, Graziela César de Sousa, Grazielle Aparecida Silva, Isabela Cristina de Oliveira Campos, Lara Silva Souza, Laura Nacife Rabello, Mariana Cristina Flores Emiliano, Roberta Ellen Santos Oliveira

**Santa Rita Hospital, City of Contagem**

Anna Clara de Jesus Oliveira, Bárbara Nogueira Roberti, Bruno Reis Garcia, Bruno Rocha Gelape, Carina Daniela Lira Moreira Figueiredo, Clara Bensemann Gontijo Pereira, Giulia de Jesus Marcolino, João Vitor Rocha Cachoeira, Júlia Romano Ferreira Santos, Sarah de Resende Silva, thalita Oliva Rios, Vitor Augusto Lima do Vale, Túlio Fonseca e Silva Quadros

**Toronto Centre for Liver Disease, University Health Network**

Bethany Barber, Camelia Capraru, Camille Lemieux, Daniel Li, David Smookler, Joshua Booth, Magdalena Kuczynski, Maria Kristina Marquez, Seham Noureldin, Shinthuka Jeganathan, Tharmegan Tharmaratnam, Wesam Aleyadeh

*Acknowledgement for our partners in Canada*

**Michael Garron Hospital:**

Jeff Powis, Maureen Taylor

**Sunnybrook Health Science Centre:**

Adrienne Chan, Elsa Salvant

**Trillium Health Partners**

Christopher Graham

**Women's College Hospital**

Marc Dagher

## **Public health authorities and mayors**

We are in debt with the following local public health authorities and mayors (listed by enrollment):

### ***City of Ibirité***

William Parreira Duarte (Mayor), Carina Bitarães (public health authority)

### ***City of Sete Lagoas***

Duílio de Castro (Mayor), Flávio Pimenta Silveira (public health authority), Alber Alípio Ribeiro (public health authority)

### ***City of Betim***

Vittorio Medioli (Mayor), Augusto Viana da Rocha (public health authority), Hilton Soares de Oliveira, Tânia Maria de Resende Amaral (public health authority)

### ***City of Santa Luzia***

Christiano Augusto Xavier Pereira (Mayor) Nádía Cristina Dias Duarte Tomé (public health authority)

### ***City of Nova Lima***

João Marcelo Diegues Pereira (Mayor), Diogo Jonata Ribeiro (public health authority)

### ***City of Montes Claros***

Humberto Guimarães Souto (Mayor), Dulce Pimenta Gonçalves (public health authority)

### ***City of Brumadinho***

Avimar de Melo Barcelos (Mayor), Eduardo Diniz Callegari (public health authority)

### ***City of Governador Valadares***

André Luiz Coelho Merlo (Mayor), Edna Gomes Leite, Caroline Martins Sangali (public health authority)

### ***City of Ouro Preto***

Angelo Oswaldo de Araujo Santos (Mayor), Glauciane Resende do Nascimento (public health authority)



## Description of Statistical Methods

All analyses involving dichotomous outcomes, including the primary outcome, were performed using the Bayesian beta-binomial model with uniform prior distributions for the individual arm event rates. Relative risks and posterior efficacy were evaluated based on size  $10^6$  Monte Carlo samples from the resultant Beta posterior distributions. The choice of prior distribution was a Beta distribution because it is a conjugate prior for a Binomial likelihood. This was critical to allowing for interim analyses updates to be made using analyses that reflected prior interim analyses and allowing for simulations that allowed to control for multiplicity. The posterior distribution is then solved for using a closed-form equation based on its relationship to priors and posteriors. Summaries were derived using Monte Carlo samples from the posterior distributions of the two arms. The choice of uniform priors was, in part, made to minimize the impact of prior information, or lack thereof, on the statistical inference. However, given the study size, no major impact of said choice was expected on the estimation, while interim analysis decision boundaries were calibrated to meet frequentist criteria of power and type I error rate. See the statistical analysis plan for more detail.

Time-to-event analyses that were not adjusted for competing risks, and numeric secondary outcomes, were performed using the default Bayesian implementation of the Cox proportional hazards model in the *brms* R library<sup>2</sup> with four independent Markov Chain Monte Carlo (MCMC) chains of size 4,000 each and a flat prior distribution assigned to the treatment assignment coefficient. The likelihood is a function of the hazard rate, cumulative hazard and survival probability as described here (<https://arxiv.org/pdf/2002.09633.pdf>). The prior and posterior distributions for each of the parameters were Normally distributed. Posterior distributions were estimated using the Hamiltonian Monte Carlo, which is a form of Markov Chain Monte Carlo in which information about the gradient of the log posterior is used to more efficiently sample from the posterior space. This was implemented in Stan using the No-U-Turn Sampler (NUTS).

# Instrument for assessing the Credibility of Effect Modification Analyses (ICEMAN) in Randomized Controlled Trials (Version 1.0)

## Quick instructions

- Synonyms for effect modification include subgroup effect, interaction, and moderation
- The instrument applies to a single proposed effect modification at a time; complete one form per each outcome, time-point, effect measure, and effect modifier
- Response options on the left indicate definitely or probably reduced, response options on the right probably or definitely increased credibility
- Completely unclear goes under probably reduced credibility
- It is helpful to provide a supporting comment or quotation under each question
- Whether an effect modification is patient-important is not part of the credibility assessment
- The manual provides more detailed instructions and examples

## Preliminary considerations

---

Study reference(s): NCT04727424

If available, protocol reference(s): NCT04727424

State a single outcome and, if applicable, time-point of interest (e.g., mortality at 1 year follow-up): **primary outcome, 28 days**

State a single effect measure of interest (e.g., relative or absolute risk difference): **Risk ratio**

State a single potential effect modifier of interest (e.g., age or comorbidity): **days since symptom onset, or vaccination status**

Was the potential effect modifier measured before or at randomization? [] yes, continue [] no, stop here, refer to manual for further instructions

## Credibility assessment

---

### 1: Was the direction of the effect modification correctly hypothesized a priori?

- |                                                                                                              |                                                           |                                                                                                                                   |                                                                                                                                             |
|--------------------------------------------------------------------------------------------------------------|-----------------------------------------------------------|-----------------------------------------------------------------------------------------------------------------------------------|---------------------------------------------------------------------------------------------------------------------------------------------|
| <input type="checkbox"/> Definitely no                                                                       | <input type="checkbox"/> Probably no or unclear           | <input type="checkbox"/> Probably yes                                                                                             | <input checked="" type="checkbox"/> Definitely yes                                                                                          |
| <i>Clearly post-hoc or results inconsistent with hypothesized direction or biologically very implausible</i> | <i>Vague hypothesis or hypothesized direction unclear</i> | <i>No prior protocol available but unequivocal statement of a priori hypothesis with correct direction of effect modification</i> | <i>Prior protocol available and includes correct specification of direction of effect modification, e.g., based on a biologic rationale</i> |
- Comment:

### 2: Was the effect modification supported by prior evidence?

- |                                                                              |                                                                                                                                       |                                                                                                                                                                             |                                                                                                                                                  |
|------------------------------------------------------------------------------|---------------------------------------------------------------------------------------------------------------------------------------|-----------------------------------------------------------------------------------------------------------------------------------------------------------------------------|--------------------------------------------------------------------------------------------------------------------------------------------------|
| <input type="checkbox"/> Inconsistent with prior evidence                    | <input type="checkbox"/> Little or no support or unclear                                                                              | <input type="checkbox"/> Some support                                                                                                                                       | <input checked="" type="checkbox"/> Strong support                                                                                               |
| <i>Prior evidence suggested a different direction of effect modification</i> | <i>No prior evidence or consistent with weak or very indirect prior evidence (e.g., animal study at high risk of bias) or unclear</i> | <i>Consistent with more limited or indirect prior evidence (e.g., large observational study, non-significant effect modification in prior RCT, or different population)</i> | <i>Consistent with strong prior evidence directly applicable to the clinical scenario (e.g., significant effect modification in related RCT)</i> |
- Comment:

### 3: Does a test for interaction suggest that chance is an unlikely explanation of the apparent effect modification? (consider irrespective of number of effect modifiers) find strongest

- |                                                                      |                                                                                                      |                                                 |                                                         |
|----------------------------------------------------------------------|------------------------------------------------------------------------------------------------------|-------------------------------------------------|---------------------------------------------------------|
| <input checked="" type="checkbox"/> Chance a very likely explanation | <input type="checkbox"/> Chance a likely explanation or unclear                                      | <input type="checkbox"/> Chance may not explain | <input type="checkbox"/> Chance an unlikely explanation |
| <i>Interaction p-value &gt;0.05</i>                                  | <i>Interaction p-value ≤0.05 and &gt;0.01, or no test of interaction reported and not computable</i> | <i>Interaction p-value ≤0.01 and &gt;0.005</i>  | <i>Interaction p-value ≤0.005</i>                       |
- Comment:
-

**4: Did the authors test only a small number of effect modifiers or consider the number in their statistical analysis?**

Definitely no

Probably no or unclear

Probably yes

Definitely yes

*Explicitly exploratory analysis or large number of effect modifiers tested (e.g., greater than 10) and multiplicity not considered in analysis*

*No mention of number or 4-10 effect modifiers tested and number not considered in analysis*

*No protocol available but unequivocal statement of 3 or fewer effect modifiers tested*

*Protocol available and 3 or fewer effect modifiers tested or number considered in analysis*

Comment:

**5: If the effect modifier is a continuous variable, were arbitrary cut points avoided?**  not applicable: not continuous

Definitely no

Probably no or unclear

Probably yes

Definitely yes

*Analysis based on exploratory cut point*

*Analysis based on cut point(s) of unclear*

*Analysis based on pre-specified cut*

*Analysis based on the full continuum,*

*(e.g., picking cut point associated with highest interaction p-value)*

*origin*

*points, e.g., suggested by prior RCT*

*e.g., assuming a linear or logarithmic relationship*

Comment:

**6 Optional: Are there any additional considerations that may increase or decrease credibility?** (manual section 2.6)

Yes, probably decrease

Yes, probably increase

Comment:

**7: How would you rate the overall credibility of the proposed effect modification?**

The overall rating should be driven by the items that decrease credibility. The following provides a sensible strategy:

- All responses definitely or probably reduced credibility or unclear → very low
- Two or more responses definitely reduced credibility → maximum usually low even if all other responses satisfy credibility criteria
- One response definitely reduced credibility → maximum usually moderate even if all other responses satisfy credibility criteria
- **Two responses probably reduced credibility → maximum usually moderate even if all other responses satisfy credibility criteria**
- No response options definitely or probably reduced credibility → high very likely

Place a mark on the continuous line (or type "x" in electronic version)

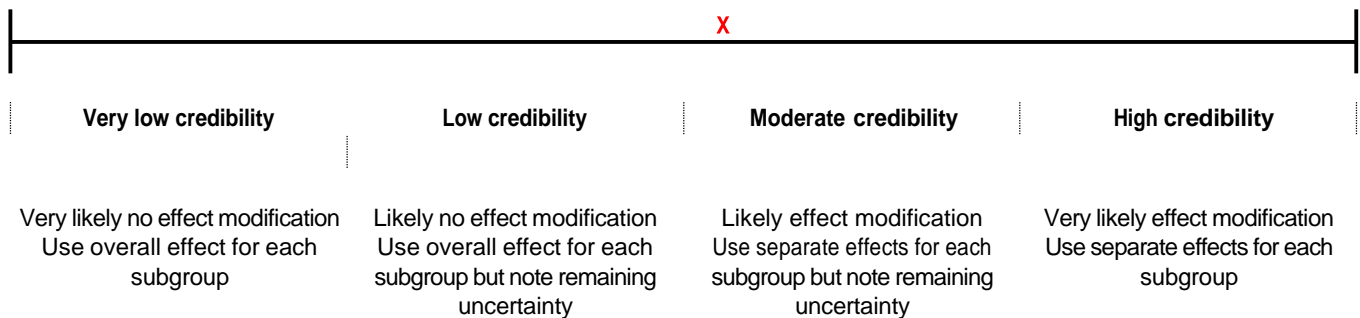

Comment:

The trial did not hypothesize any subgroup effects and no effect modification was found.

# GRADE Analysis

Author(s): Reis et. al

Question: Fluvoxamine plus budesonide compared to placebo for COVID-19

Setting: Outpatient, high risk

Bibliography:

| Certainty assessment                              |                   |              |               |              |             |                      | No of patients              |               | Effect                            |                                                         | Certainty | Importance |
|---------------------------------------------------|-------------------|--------------|---------------|--------------|-------------|----------------------|-----------------------------|---------------|-----------------------------------|---------------------------------------------------------|-----------|------------|
| No of studies                                     | Study design      | Risk of bias | Inconsistency | Indirectness | Imprecision | Other considerations | fluvoxamine plus budesonide | placebo       | Relative (95% CI)                 | Absolute (95% CI)                                       |           |            |
| <b>Primary Outcome (follow-up: 28 days)</b>       |                   |              |               |              |             |                      |                             |               |                                   |                                                         |           |            |
| 1                                                 | randomised trials | not serious  | not serious   | not serious  | not serious |                      | 14/743 (1.9%)               | 30/740 (4.1%) | <b>RR 0.48</b><br>(0.25 to 0.86)  | <b>21 fewer per 1,000</b><br>(from 30 fewer to 6 fewer) | -         | CRITICAL   |
| <b>Hospitalization or Death due to COVID-19</b>   |                   |              |               |              |             |                      |                             |               |                                   |                                                         |           |            |
| 1                                                 | randomised trials | not serious  | not serious   | not serious  | not serious |                      | 7/743 (0.9%)                | 9/740 (1.2%)  | <b>RR 0.77</b><br>(0.29 to 2.06)  | <b>3 fewer per 1,000</b><br>(from 9 fewer to 13 more)   | -         | CRITICAL   |
| <b>Death due to COVID-19 (follow-up: 28 days)</b> |                   |              |               |              |             |                      |                             |               |                                   |                                                         |           |            |
| 1                                                 | randomised trials | not serious  | not serious   | not serious  | not serious |                      | 1/743 (0.1%)                | 0/740 (0.0%)  | <b>RR 2.98</b><br>(0.12 to 73.23) | <b>0 fewer per 1,000</b><br>(from 0 fewer to 0 fewer)   | -         | CRITICAL   |

CI: confidence interval; RR: risk ratio

# Bayesian Analysis Code

## 1. Bayesian analysis of dichotomous outcomes Function arguments:

1. **Data**: study data
2. **var**: specify the *column name* from **data** which contains variable to analyze
3. **interim\_id\_N/interim\_id\_r**: sample size and N events at each interim analysis
4. **Treatment**: specify the *column name* from **data** which contains the name of the study arms
5. **parameters**: specify parameters to be calculated
6. **code\_location**: path where model text file is stored
7. **seed**: set random seed (numeric)
8. **outloc**: specify the directory location where outputs will be saved
9. **density**: Return density. Default FALSE.

```
run_dichotomous = function(data, var, interim_id_n = NULL, interim_id_r = NULL, Treatment, parameters = c("p_int",
, "p_ctrl", "pval", "RRR", "RR"), code_location = codeloc, outloc, seed, density=FALSE){

##### #
# 1. A few basic set-up configurations

MODELFILE = paste0(code_location, "modelfile.txt")

# Verify that data is a data.frame
data = as.data.frame((data))

if(plots){
  # Set-up the figures folder
  dir.create(file.path(outloc, "Figures"), showWarnings = FALSE)
  dir.create(file.path(outloc, "Figures/Convergence plots"), showWarnings = FALSE)
  figureloc = paste0(outloc, "/Figures/")
  convergefignloc = paste0(outloc, "/Figures/Convergence plots/")
}
Treatments = names(summary(as.factor(data[,Treatment])))
data$intervention = rep(1, length(data[,Treatment]))
placebo = Treatments[grepl("placebo", tolower(Treatments), fixed = TRUE)]
data$intervention[data[,Treatment] == placebo] = 0

data$temp<-(data[[var]])
passed=FALSE

# 2 Data prep
if(is.null(interim_id_n)){
  datause <- list (N = 1,
                  r_int = sum(data$temp[data$intervention == 1], na.rm=T),
                  r_ctrl = sum(data$temp[data$intervention == 0], na.rm = T),
                  n_int = sum(data$intervention),
                  n_ctrl = sum(data$intervention == 0))
}else{
  interim_n = data[, names(data) == interim_id_n]
  interim_r = data[, names(data) == interim_id_r]
  interim_tags = names(summary(as.factor(interim_n)))
  N = length(interim_tags)
  r_int = r_ctrl = n_int = n_ctrl = rep(0, N)
  for(i in 1:N){
    r_int[i] = sum(data$temp[(data$intervention == 1) & (interim_r == interim_tags[i])])
    r_ctrl[i] = sum(data$temp[(data$intervention == 0) & (interim_r == interim_tags[i])])
    n_int[i] = sum(data$intervention[interim_n == interim_tags[i]])
    n_ctrl[i] = sum((data$intervention == 0) & (interim_n == interim_tags[i]))
  }
  datause <- list (N = N,
                  r_int = r_int,
                  r_ctrl = r_ctrl,
                  n_int = n_int,
                  n_ctrl = n_ctrl)
}

##### #
```

```

# 3 Run JAGS
NBURNIN = 25000
NITER= 100000
NTHIN=2

print('data prep complete')

# RUN JAGS
print ("begin jags")
jags1 <- (jags.model( file = MODELFILE, data = datause, n.chains = 2, n.adapt = NBURNIN, inits = list(.RNG.name
="base::Super-Duper",.RNG.seed=seed)) )
print("part 1 jags.model with 50,000 iterations complete")

update(jags1,NBURNIN)
print('part 2 update complete')

monitorparms = parameters
jags.out <- coda.samples(jags1, monitorparms, n.iter = NITER, thin = NTHIN)
print("part 3 coda.samples collecting results/coda complete.")

# DIC .....
DIC = dic.samples(jags1, NITER, type= "pD")
print('part 4 dic.samples(jags1, NITER, type= "pD") complete')

pD_ = round(sum(DIC$penalty,na.rm=TRUE),3)
deviance_ = round(sum(DIC$deviance,na.rm=TRUE),3)
dic_ = pD_ + deviance_
results2 = data.frame(Dbar=deviance_, pD=pD_, DIC=dic_)

tempR = summary(jags.out)

##### #
# 4 Prep the outputs
results = data.frame((tempR$statistics)[,c(1,2)],tempR$quantiles, tempR$start, tempR$end)

## Save convergence plots
temp = jags.out
cnames = colnames(temp[[1]])
temp[[1]] = (temp[[1]])[,cnames == "RR"]
temp[[2]] = (temp[[2]])[,cnames == "RR"]
#png(paste(convergefigloc, "/Gelman plot - ", , ".png", sep=""))
#gelman.plot(temp,autoburnin = FALSE)
#dev.off()
if(plots){
  png(paste(convergefigloc, "Density plot ", var, ".png", sep=""))
  plot(temp)
  dev.off()
}

posterior <- as.array(jags.out)
post <- as_data_frame(posterior)

estimate=paste0(format(round(results$X50.[1], 2),nsmall=2), " (",
  format(round(results$X2.5.[1],2),nsmall=2), ", ",
  format(round(results$X97.5.[1], 2),nsmall=2), ")") )
prob=format(round(results$Mean[5], 3),nsmall=3)

if(density){
  return(list(estimate, prob, results2, post))
}else{
  return(list(estimate,prob, results2))
}
}

```

### Contents of modelfile.txt

```

model{
  for(j in 1:N){ # N is the number of interim analyses
    r_int[j] ~ dbin(p_int, n_int[j])
    r_ctrl[j] ~ dbin(p_ctrl, n_ctrl[j])
  }
}

```

```

p_int ~ dbeta(1, 1)
p_ctrl ~ dbeta(1,1)
# Output
pval = step(p_ctrl - p_int)
RRR = 1 - p_int/p_ctrl
RR = p_int/p_ctrl
}

```

## 2. Bayesian analysis of time-to-event outcomes

### Function arguments:

1. **data**: data
2. **event**: specify the *column name* from **data** which contains events (0 or 1)
3. **event\_date**: specify the *column name* from **data** which contains event dates
4. **rand\_date**: specify the *column name* from **data** which contains the date of randomization
5. **lastFU\_date**: specify the *column name* from **data** which contains the date of last follow-up
6. **Treatment**: specify the *column name* from **data** which contains the name of the study arms
7. **outloc**: specify the directory location where outputs will be saved
8. **iteration**: specify the number of iterations.

```

tte_bayes <- function(data, event, event_date, rand_date, lastFU_date, Treatment, outloc, iteration=2000)
{
  dir.create(file.path(outloc, "Figures"), showWarnings = FALSE)
  dir.create(file.path(outloc, "Figures/Convergeplot"), showWarnings = FALSE)

  figureloc <- paste0(outloc, "Figures")
  convergefigloc <- paste0(outloc, "Figures/Convergeplot")

  # Data prep
  eval(parse(text=paste0("data$Status = data$", event_response)))
  eval(parse(text=paste0("data$event_date = data$", event_date)))
  eval(parse(text=paste0("data$studyend = data$", studyenddate)))
  eval(parse(text=paste0("data$studystart = data$", rand_date)))
  eval(parse(text=paste0("data$Treatment = data$", Treatment)))

  data$followup<-difftime(data$lastFU_date, data$RANDDAT, units=c("days"))
  data$enddat<-if_else(data$Status==1, data$Outcome_dat, data$lastFU_date)
  data$status<-if_else(data$Status==1, "Met outcome", "Did not meet outcome")
  data$followuptime<-as.numeric(difftime(data$enddat, data$RANDDAT, units=c("days")))
  data$Status[data$followuptime>28] = 0
  data$Time<-if_else(data$followuptime>=28, 28, data$followuptime)
  data$Time[data$Time == 0] = 1

  treatment_name <- names(table(data$Treatment))
  intervention <- treatment_name[treatment_name!="Placebo"]
  data$treat <- if_else(data$Treatment==intervention, 1, 0)

  # Run model
  res <- brm(time|cens(1-Status)~treat, data=data, family = brmsfamily("cox"), sample_prior = "no", save_pars = sav
e_pars(all=TRUE), seed=553, iter = iteration)
  res_mcmc <- as.mcmc(res)
  bayes_probability <- mean(c(sum((res_mcmc[[1]]),2)<0)/length((res_mcmc[[1]]),2), sum((res_mcmc[[2]]),2)<0)/le
ngth((res_mcmc[[2]]),2), sum((res_mcmc[[3]]),2)<0)/length((res_mcmc[[3]]),2), sum((res_mcmc[[4]]),2)<0)/lengt
h((res_mcmc[[4]]),2)))

  s_res <- summary(res)
  s_res_HR <- (s_res$fixed$Estimate)[2]
  s_res_lc <- (s_res$fixed$`l-95% CI`)[2]
  s_res_uc <- (s_res$fixed$`u-95% CI`)[2]
  bayesian_Hr <- paste(formatC(round(exp(s_res_HR),2), format='f', digit=2), " (", formatC(round(exp(s_res_lc),2),
format='f', digit=2), ", ",
                        formatC(round(exp(s_res_uc),2), format='f', digit=2), " )")

  # Return all of the results
  return(list(bayesian_Hr = bayesian_Hr, bayes_probability = bayes_probability, s_res_HR = s_res_HR, s_res_lc =s_re
s_lc, s_res_uc = s_res_uc, model=res))
}

```
